# Supplementary material for: The Genomic Contributions of Avian H1N1 Influenza A Viruses to the Evolution of Mammalian Strains
Source: PubMed Central journal article supplement (PMC4514870; doi:10.1371/journal.pone.0133795), 2015-07-24
Supplement: pone.0133795.s007.pdf [file pone.0133795.s007.pdf]

**S1 Table.** H1N1 IAVs of avian, swine, and human origin from North America and Eurasia that were used in this study and their GenBank accession numbers for 8 gene segments.

| geography/host origin <sup>a</sup>                    | taxon                                 | PB2                                            | PB1      | PA       | HA       | NP       | NA       | M        | NS       | pathogenicity index <sup>b</sup> |
|-------------------------------------------------------|---------------------------------------|------------------------------------------------|----------|----------|----------|----------|----------|----------|----------|----------------------------------|
| North American avian/St. Jude                         | A/mallard/ALB/119/1998                | KF424175                                       | KF424176 | KF424177 | KF424178 | KF424179 | KF424180 | KF424181 | KF424182 | 4                                |
|                                                       | A/mallard/MN/AI07-3100/2007           | KF424015                                       | KF424016 | KF424017 | KF424018 | KF424019 | KF424020 | KF424021 | KF424022 | 4                                |
|                                                       | A/shorebird/DE/300/2009               | KF424127                                       | KF424128 | KF424129 | KF424130 | KF424131 | KF424132 | KF424133 | KF424134 | 4                                |
|                                                       | A/mallard/ALB/201/1998                | KF424047                                       | KF424048 | KF424049 | KF424050 | KF424051 | KF424052 | KF424053 | KF424054 | 4                                |
|                                                       | A/pintail/ALB/210/2002                | KF424111                                       | KF424112 | KF424113 | KF424114 | KF424115 | KF424116 | KF424117 | KF424118 | 4                                |
|                                                       | A/mallard/OH/4809-9/2008              | KF424151                                       | KF424152 | KF424153 | KF424154 | KF424155 | KF424156 | KF424157 | KF424158 | 4                                |
|                                                       | A/mallard/MN/AI07-3136/2007           | KF424167                                       | KF424168 | KF424169 | KF424170 | KF424171 | KF424172 | KF424173 | KF424174 | 4                                |
|                                                       | A/mallard/MN/AI07-3127/2007           | KF424207                                       | KF424208 | KF424209 | KF424210 | KF424211 | KF424212 | KF424213 | KF424214 | 4                                |
|                                                       | A/shorebird/DE/324/2009               | KF424079                                       | KF424080 | KF424081 | KF424082 | KF424083 | KF424084 | KF424085 | KF424086 | 4                                |
|                                                       | A/mallard/ALB/88/2004                 | KF424039                                       | KF424040 | KF424041 | KF424042 | KF424043 | KF424044 | KF424045 | KF424046 | 4                                |
|                                                       | A/red headed duck/MN/Sg-00123/2007    | KF424191                                       | KF424192 | KF424193 | KF424194 | KF424195 | KF424196 | KF424197 | KF424198 | 3                                |
|                                                       | A/pintail/ALB/68/2005                 | KF424215                                       | KF424216 | KF424217 | KF424218 | KF424219 | KF424220 | KF424221 | KF424222 | 3                                |
|                                                       | A/pintail/ALB/69/2005                 | KF424103                                       | KF424104 | KF424105 | KF424106 | KF424107 | KF424108 | KF424109 | KF424110 | 3                                |
|                                                       | A/mallard/MN/Sg-00121/2007            | KF424239                                       | KF424240 | KF424241 | KF424242 | KF424243 | KF424244 | KF424245 | KF424246 | 3                                |
|                                                       | A/northern shoveler/MN/Sg-00651/2008  | KF424031                                       | KF424032 | KF424033 | KF424034 | KF424035 | KF424036 | KF424037 | KF424038 | 3                                |
|                                                       | A/gull/DE/428/2009                    | KF424023                                       | KF424024 | KF424025 | KF424026 | KF424027 | KF424028 | KF424029 | KF424030 | 3                                |
|                                                       | A/northern shoveler/MN/Sg-00655/2008  | KF424247                                       | KF424248 | KF424249 | KF424250 | KF424251 | KF424252 | KF424253 | KF424254 | 3                                |
|                                                       | A/mallard/ALB/267/1996                | KF424095                                       | KF424096 | KF424097 | KF424098 | KF424099 | KF424100 | KF424101 | KF424102 | 3                                |
|                                                       | A/shorebird/DE/170/2009               | KF424071                                       | KF424072 | KF424073 | KF424074 | KF424075 | KF424076 | KF424077 | KF424078 | 3                                |
|                                                       | A/northern shoveler/MO/466554-14/2007 | KF424119                                       | KF424120 | KF424121 | KF424122 | KF424123 | KF424124 | KF424125 | KF424126 | 3                                |
|                                                       | A/mallard/MN/AI07-3018/2007           | KF424199                                       | KF424200 | KF424201 | KF424202 | KF424203 | KF424204 | KF424205 | KF424206 | 3                                |
|                                                       | A/blue winged teal/LA/B228/1986       | KF424183                                       | KF424184 | KF424185 | KF424186 | KF424187 | KF424188 | KF424189 | KF424190 | 3                                |
|                                                       | A/mallard/TN/11464/1985               | KF424143                                       | KF424144 | KF424145 | KF424146 | KF424147 | KF424148 | KF424149 | KF424150 | 3                                |
|                                                       | A/mallard/MN/AI07-3140/2007           | KF424255                                       | KF424256 | KF424257 | KF424258 | KF424259 | KF424260 | KF424261 | KF424262 | 3                                |
|                                                       | A/canvasback/ALB/276/2005             | KF424159                                       | KF424160 | KF424161 | KF424162 | KF424163 | KF424164 | KF424165 | KF424166 | 3                                |
|                                                       | A/blue winged teal/ALB/212/1984       | KF424231                                       | KF424232 | KF424233 | KF424234 | KF424235 | KF424236 | KF424237 | KF424238 | 3                                |
|                                                       | A/mallard/MN/Sg-00628/2008            | KF424135                                       | KF424136 | KF424137 | KF424138 | KF424139 | KF424140 | KF424141 | KF424142 | 3                                |
|                                                       | A/shorebird/DE/318/2009               | KF424223                                       | KF424224 | KF424225 | KF424226 | KF424227 | KF424228 | KF424229 | KF424230 | 2                                |
|                                                       | A/mallard/MN/Sg-00627/2008            | KF424055                                       | KF424056 | KF424057 | KF424058 | KF424059 | KF424060 | KF424061 | KF424062 | 2                                |
|                                                       | A/shorebird/DE/274/2009               | KF424063                                       | KF424064 | KF424065 | KF424066 | KF424067 | KF424068 | KF424069 | KF424070 | 2                                |
|                                                       | A/green winged teal/LA/Sg-00090/2007  | KF424087                                       | KF424088 | KF424089 | KF424090 | KF424091 | KF424092 | KF424093 | KF424094 | 1                                |
|                                                       | North American avian                  | A/American black duck/New Brunswick/01989/2007 | CY129381 | CY129380 | CY129379 | CY129374 | CY129377 | CY129376 | CY129375 | CY129378                         |
| A/American green-winged teal/Mississippi/110S256/2011 |                                       | CY133692                                       | CY133691 | CY133690 | CY133685 | CY133688 | CY133687 | CY133686 | CY133689 |                                  |
| A/American green-winged teal/Wisconsin/100S2847/2010  |                                       | CY133092                                       | CY133091 | CY133090 | CY133085 | CY133088 | CY133087 | CY133086 | CY133089 |                                  |
| A/American green-winged teal/Wisconsin/2743/2009      |                                       | CY097509                                       | CY097508 | CY097507 | CY097502 | CY097505 | CY097504 | CY097503 | CY097506 |                                  |
| A/blue-winged teal/Alberta/141/1992                   |                                       | CY004545                                       | CY004544 | CY004543 | CY004539 | CY004541 | CY014568 | CY004540 | CY004542 |                                  |
| A/blue winged teal/TX/27/2002                         | FJ357060                              | FJ357059                                       | FJ357058 | FJ357053 | FJ357056 | FJ357055 | FJ357054 | FJ357057 |          |                                  |

|                                                  |          |          |          |          |          |          |          |          |
|--------------------------------------------------|----------|----------|----------|----------|----------|----------|----------|----------|
| A/duck/Alberta/35/1976                           | CY130013 | CY130012 | CY130011 | CY130006 | CY130009 | CY130008 | CY130007 | CY130010 |
| A/duck/Interior Alaska/7MP1582/2007              | CY078994 | CY078993 | CY078992 | CY078987 | CY078990 | CY078989 | CY078988 | CY078991 |
| A/duck/NJ/7717-70/1995                           | EU026117 | EU026116 | EU026115 | EU026110 | EU026113 | EU026112 | EU026111 | EU026114 |
| A/duck/NY/13152-13/1994                          | EU026109 | EU026108 | EU026107 | EU026102 | EU026105 | EU026104 | EU026103 | EU026106 |
| A/green-winged teal/California/123/2012          | CY134358 | CY134357 | CY134356 | CY134351 | CY134354 | CY134353 | CY134352 | CY134355 |
| A/green-winged/teal/California/2940/2011         | CY134326 | CY134325 | CY134324 | CY134319 | CY134322 | CY134321 | CY134320 | CY134323 |
| A/green-winged/teal/California/96/2012           | CY134350 | CY134349 | CY134348 | CY134343 | CY134346 | CY134345 | CY134344 | CY134347 |
| A/green-winged/teal/Ohio/72/1999                 | CY017724 | CY017723 | CY017722 | CY017717 | CY017720 | CY017719 | CY017718 | CY017721 |
| A/mallard/Alberta/127/1977                       | CY004599 | CY004598 | CY004597 | CY004592 | CY004595 | CY004594 | CY004593 | CY004596 |
| A/mallard/Alberta/211/1998                       | CY103740 | CY103739 | CY103738 | CY103733 | CY103736 | CY103735 | CY103734 | CY103737 |
| A/mallard/Alberta/322/1988                       | CY004538 | CY004537 | CY004536 | CY004531 | CY004534 | CY004533 | CY004532 | CY004535 |
| A/mallard/Alberta/46/1977                        | CY004473 | CY004472 | CY004471 | CY004466 | CY004469 | CY004468 | CY004467 | CY004470 |
| A/mallard/Alberta/965/1979                       | CY004497 | CY004496 | CY004495 | CY004490 | CY004493 | CY004492 | CY004491 | CY004494 |
| A/mallard/California/20385-004/2007              | CY076140 | CY076139 | CY076138 | CY076133 | CY076136 | CY076135 | CY076134 | CY076137 |
| A/mallard/California/3134/2010                   | CY120618 | CY120617 | CY120616 | CY120611 | CY120614 | CY120613 | CY120612 | CY120615 |
| A/mallard/California/5351/2009                   | CY094708 | CY094707 | CY094706 | CY094701 | CY094704 | CY094703 | CY094702 | CY094705 |
| A/mallard/California/6768/2009                   | CY094556 | CY094555 | CY094554 | CY094549 | CY094552 | CY094551 | CY094550 | CY094553 |
| A/mallard/California/8843/2008                   | CY093662 | CY093661 | CY093660 | CY093655 | CY093658 | CY093657 | CY093656 | CY093659 |
| A/mallard/Interior Alaska/7MP0172/2007           | CY078938 | CY078937 | CY078936 | CY078931 | CY078934 | CY078933 | CY078932 | CY078935 |
| A/mallard/Interior Alaska/7MP0747/2007           | CY078962 | CY078961 | CY078960 | CY078955 | CY078958 | CY078957 | CY078956 | CY078959 |
| A/mallard/Interior Alaska/8BM2102/2008           | CY080122 | CY080121 | CY080120 | CY080115 | CY080118 | CY080117 | CY080116 | CY080119 |
| A/mallard/Maryland/02-375/2002                   | EU743599 | EU743598 | EU743597 | EU743592 | EU743595 | EU743594 | EU743593 | EU743596 |
| A/mallard/Maryland/170/2002                      | EU026044 | EU026043 | EU026042 | EU026037 | EU026040 | EU026039 | EU026038 | EU026041 |
| A/mallard/Maryland/199/2003                      | EU980523 | EU980522 | EU980521 | EU980516 | EU980519 | EU980518 | EU980517 | EU980520 |
| A/mallard/Maryland/403/2002                      | EU026089 | EU026088 | EU026087 | EU026082 | EU026085 | EU026084 | EU026083 | EU026086 |
| A/mallard/Mississippi/10OS4494/2010              | CY133305 | CY133304 | CY133303 | CY133298 | CY133301 | CY133300 | CY133299 | CY133302 |
| A/mallard/Mississippi/413/2010                   | CY097769 | CY097768 | CY097767 | CY097762 | CY097765 | CY097764 | CY097763 | CY097766 |
| A/mallard/Mississippi/442/2010                   | CY097777 | CY097776 | CY097775 | CY097770 | CY097773 | CY097772 | CY097771 | CY097774 |
| A/mallard/Nova Scotia/02153/2007                 | CY128925 | CY128924 | CY128923 | CY128918 | CY128921 | CY128920 | CY128919 | CY128922 |
| A/mallard/Ohio/118/1993                          | CY018892 | CY018891 | CY018890 | CY018885 | CY018888 | CY018887 | CY018886 | CY018889 |
| A/mallard/Ohio/11OS1991/2011                     | CY132252 | CY132251 | CY132250 | CY132245 | CY132248 | CY132247 | CY132246 | CY132249 |
| A/mallard/Ohio/11OS2001/2011                     | CY132532 | CY132531 | CY132530 | CY132525 | CY132528 | CY132527 | CY132526 | CY132529 |
| A/mallard/Ohio/11OS2078/2011                     | CY132236 | CY132235 | CY132234 | CY132229 | CY132232 | CY132231 | CY132230 | CY132233 |
| A/mallard/Ohio/11OS2120/2011                     | CY132564 | CY132563 | CY132562 | CY132557 | CY132560 | CY132559 | CY132558 | CY132561 |
| A/mallard/Ohio/11OS2232/2011                     | CY132244 | CY132243 | CY132242 | CY132237 | CY132240 | CY132239 | CY132238 | CY132241 |
| A/mallard/Ohio/171/1990                          | CY012807 | CY012806 | CY012805 | CY012800 | CY012803 | CY012802 | CY012801 | CY012804 |
| A/mallard/Ohio/66/1999                           | CY016962 | CY016961 | CY016960 | CY016955 | CY016958 | CY016957 | CY016956 | CY016959 |
| A/mallard/Washington/44338-218/2007              | CY076644 | CY076643 | CY076642 | CY076637 | CY076640 | CY076639 | CY076638 | CY076641 |
| A/mallard/Wisconsin/2755/2009                    | CY097009 | CY097008 | CY097007 | CY097002 | CY097005 | CY097004 | CY097003 | CY097006 |
| A/mallard/Wisconsin/3165/2009                    | CY097389 | CY097388 | CY097387 | CY097382 | CY097385 | CY097384 | CY097383 | CY097386 |
| A/mallard/Wisconsin/4194/2009                    | CY097397 | CY097396 | CY097395 | CY097390 | CY097393 | CY097392 | CY097391 | CY097394 |
| A/mallard/Wisconsin/4197/2009                    | CY097413 | CY097412 | CY097411 | CY097406 | CY097409 | CY097408 | CY097407 | CY097410 |
| A/northern pintail/California/183/2012           | CY134374 | CY134373 | CY134372 | CY134367 | CY134370 | CY134369 | CY134368 | CY134371 |
| A/northern pintail/California/3452/2010          | CY120658 | CY120657 | CY120656 | CY120651 | CY120654 | CY120653 | CY120652 | CY120655 |
| A/northern pintail/Interior Alaska/1/2007        | CY039744 | CY039745 | CY039746 | CY039747 | CY039748 | CY039749 | CY039750 | CY039751 |
| A/northern shoveler/California/138/2012          | CY134366 | CY134365 | CY134364 | CY134359 | CY134362 | CY134361 | CY134360 | CY134363 |
| A/northern shoveler/Interior Alaska/7MP1077/2007 | CY077301 | CY077300 | CY077299 | CY077294 | CY077297 | CY077296 | CY077295 | CY077298 |
| A/pintail/Alberta/21/2006                        | CY045398 | CY045397 | CY045396 | CY045391 | CY045394 | CY045393 | CY045392 | CY045395 |
| A/pintail duck/ALB/219/1977                      | CY004481 | CY004480 | CY004479 | CY004474 | CY004477 | CY004476 | CY004475 | CY004478 |

North American swine

|                                         |          |          |          |          |          |          |          |          |
|-----------------------------------------|----------|----------|----------|----------|----------|----------|----------|----------|
| A/pintail duck/ALB/238/1979             | CY004489 | CY004488 | CY004487 | CY004482 | CY004485 | CY004484 | CY004483 | CY004486 |
| A/ruddy turnstone/Delaware Bay/123/1994 | CY101941 | CY101940 | CY101939 | CY101934 | CY101937 | CY101936 | CY101935 | CY101938 |
| A/shorebird/Delaware/246/2006           | CY043911 | CY043910 | CY043909 | CY043904 | CY043907 | CY043906 | CY043905 | CY043908 |
| A/swine/Alberta/56626/03/2003           | DQ280197 | DQ280198 | DQ280199 | DQ280203 | DQ280201 | DQ280202 | DQ280204 | DQ280200 |
| A/swine/Illinois/02064/2008             | CY099102 | CY099101 | CY099100 | CY099095 | CY099098 | CY099097 | CY099096 | CY099099 |
| A/swine/Illinois/02238/2008             | CY099076 | CY099075 | CY099074 | CY099069 | CY099072 | CY099071 | CY099070 | CY099073 |
| A/swine/Illinois/02251/2008             | CY099262 | CY099261 | CY099260 | CY099255 | CY099258 | CY099257 | CY099256 | CY099259 |
| A/swine/Illinois/02695/2009             | CY099278 | CY099277 | CY099276 | CY099271 | CY099274 | CY099273 | CY099272 | CY099275 |
| A/swine/Illinois/A00857129/2011         | JX099362 | JX099363 | JX099364 | JX099365 | JX099366 | JX099367 | JX099368 | JX099369 |
| A/swine/Illinois/A00857136c/2011        | JX099386 | JX099387 | JX099388 | JX099389 | JX099390 | JX099391 | JX099392 | JX099393 |
| A/swine/Illinois/A01049905/2011         | JX045953 | JX045954 | JX045955 | JN652506 | JX045956 | JN652540 | JN652575 | JX045957 |
| A/swine/Illinois/A01104011/2012         | JX099394 | JX099395 | JX099396 | JX099397 | JX099398 | JX099399 | JX099400 | JX099401 |
| A/swine/Illinois/A01202615/2011         | KC508545 | KC508546 | KC508547 | JX092309 | KC508548 | JX092358 | JX092407 | KC508549 |
| A/swine/Illinois/A01203226/2012         | KC616632 | KC616633 | KC616634 | JQ739699 | KC616635 | JQ739711 | JQ739705 | KC616636 |
| A/swine/Illinois/SG1141/2003            | CY099198 | CY099197 | CY099196 | CY099191 | CY099194 | CY099193 | CY099192 | CY099195 |
| A/swine/Indiana/A01202622/2011          | KC508588 | KC508589 | KC508590 | JX092312 | KC508591 | JX092361 | JX092410 | KC508592 |
| A/swine/Indiana/A01260029/2012          | KC508565 | KC508566 | KC508567 | KC167135 | KC508568 | KC167136 | KC167137 | KC508569 |
| A/swine/Iowa/1/1987                     | CY022969 | CY022968 | CY022967 | CY022962 | CY022965 | CY022964 | CY022963 | CY022966 |
| A/swine/Iowa/17672/1988                 | CY022340 | CY022339 | CY022338 | CY022333 | CY022336 | CY022335 | CY022334 | CY022337 |
| A/swine/Iowa/2/1986                     | CY096890 | CY096889 | CY096888 | CY096883 | CY096886 | CY096885 | CY096884 | CY096887 |
| A/swine/Iowa/2/1987                     | CY028178 | CY028177 | CY028176 | CY028171 | CY028174 | CY028173 | CY028172 | CY028175 |
| A/swine/Iowa/31483/1988                 | CY022977 | CY022976 | CY022975 | CY022970 | CY022973 | CY022972 | CY022971 | CY022974 |
| A/swine/Iowa/3/1985                     | CY022332 | CY022331 | CY022330 | CY022325 | CY022328 | CY022327 | CY022326 | CY022329 |
| A/swine/Iowa/3421/1990                  | CY096882 | CY096881 | CY096880 | CY096875 | CY096878 | CY096877 | CY096876 | CY096879 |
| A/swine/Iowa/A01049210/2010             | JQ738184 | JQ738185 | JQ738186 | JQ398772 | JQ738187 | JQ398759 | JQ398748 | JQ738188 |
| A/swine/Iowa/A01049894/2011             | JX045948 | JX045949 | JX045950 | JN652505 | JX045951 | JN652538 | JN652573 | JX045952 |
| A/swine/Iowa/A01049950/2011             | JX045958 | JX045959 | JX045960 | JN652513 | JX045961 | JN652547 | JN652581 | JX045962 |
| A/swine/Iowa/A01267837/2012             | KC616677 | KC616678 | KC616679 | KC117391 | KC616680 | KC117393 | KC117392 | KC616681 |
| A/swine/Iowa/H03G1/2003                 | GU135907 | GU135908 | GU135909 | GU135910 | GU135911 | GU135912 | GU135913 | GU135914 |
| A/swine/Iowa/H03HS5/2003                | GU135930 | GU135931 | GU135932 | GU135933 | GU135934 | GU135935 | GU135936 | GU135937 |
| A/swine/Iowa/H03LJ10/2003               | GU135946 | GU135947 | GU135948 | GU135949 | GU135950 | GU135951 | GU135952 | GU135953 |
| A/swine/Iowa/H03LS4/2003                | GU135954 | GU135955 | GU135956 | GU135957 | GU135958 | GU135959 | GU135960 | GU135961 |
| A/swine/Kansas/77778/2007               | GQ484358 | GQ484357 | GQ484359 | GQ484355 | GQ484360 | GQ484356 | GQ484361 | GQ484362 |
| A/swine/La Habana/130/2010              | HE584753 | HE584754 | HE584755 | HE584756 | HE584757 | HE584758 | HE584759 | HE584760 |
| A/swine/Memphis/1/1990                  | CY035077 | CY035076 | CY035075 | CY035070 | CY035073 | CY035072 | CY035071 | CY035074 |
| A/swine/Mexico/Mex19/2010               | CY122330 | CY122331 | CY122332 | CY122333 | CY122334 | CY122335 | CY122336 | CY122337 |
| A/swine/Mexico/Ver29/2010               | CY122386 | CY122387 | CY122388 | CY122389 | CY122390 | CY122391 | CY122392 | CY122393 |
| A/swine/Michigan/A01202708/2011         | KC508550 | KC508551 | KC508552 | JX092421 | KC508553 | JX092461 | JX092501 | KC508554 |
| A/swine/Minnesota/001200/2006           | CY099084 | CY099083 | CY099082 | CY099077 | CY099080 | CY099079 | CY099078 | CY099081 |
| A/swine/Minnesota/01358/2006            | CY099174 | CY099173 | CY099172 | CY099167 | CY099170 | CY099169 | CY099168 | CY099171 |
| A/swine/Minnesota/02053/2008            | CY099126 | CY099125 | CY099124 | CY099119 | CY099122 | CY099121 | CY099120 | CY099123 |
| A/swine/Minnesota/02475/2008            | CY099246 | CY099245 | CY099244 | CY099239 | CY099242 | CY099241 | CY099240 | CY099243 |
| A/swine/Minnesota/02905/2009            | CY099142 | CY099141 | CY099140 | CY099135 | CY099138 | CY099137 | CY099136 | CY099139 |
| A/swine/Minnesota/07002083/2007         | FJ611896 | FJ611895 | FJ611897 | FJ611898 | FJ611899 | FJ611900 | FJ611901 | FJ611902 |
| A/swine/Minnesota/6998/2003             | CY098481 | CY098482 | CY098483 | CY098484 | CY098485 | CY098486 | CY098487 | CY098488 |
| A/swine/Minnesota/A01049893/2011        | JX045943 | JX045944 | JX045945 | JN652504 | JX045946 | JN652537 | JN652572 | JX045947 |
| A/swine/Minnesota/A01267908/2012        | KC616682 | KC616683 | KC616684 | KC167153 | KC616685 | KC167155 | KC167154 | KC616686 |
| A/swine/Minnesota/SG1144/2006           | CY099206 | CY099205 | CY099204 | CY099199 | CY099202 | CY099201 | CY099200 | CY099203 |
| A/swine/MN/23506/2009                   | HM125979 | HM125980 | HM125981 | HM125982 | HM125983 | HM125984 | HM125985 | HM125986 |

|                                     |          |          |          |          |          |          |          |          |
|-------------------------------------|----------|----------|----------|----------|----------|----------|----------|----------|
| A/swine/North Carolina/00839/2005   | CY099158 | CY099157 | CY099156 | CY099151 | CY099154 | CY099153 | CY099152 | CY099155 |
| A/swine/North Carolina/18161/2002   | CY098513 | CY098514 | CY098515 | CY098516 | CY098517 | CY098518 | CY098519 | CY098520 |
| A/swine/North Carolina/3793/2008    | JQ624664 | JQ624665 | JQ624666 | JQ624667 | JQ624668 | JQ624669 | JQ624670 | JQ624671 |
| A/swine/North Carolina/47834/2000   | CY098473 | CY098474 | CY098475 | CY098476 | CY098477 | CY098478 | CY098479 | CY098480 |
| A/swine/North Dakota/A01104053/2012 | KC435073 | KC435074 | KC435075 | KC435076 | KC435077 | KC435078 | KC435079 | KC435080 |
| A/swine/OH/511445/2007              | EU604691 | EU604692 | EU604693 | EU604689 | EU604694 | EU604690 | EU604695 | EU604696 |
| A/swine/Ontario/11112/2004          | DQ280245 | DQ280246 | DQ280247 | DQ280250 | DQ280249 | DQ280251 | DQ280252 | DQ280248 |
| A/swine/Ontario/23866/2004          | DQ280237 | DQ280238 | DQ280239 | DQ280243 | DQ280241 | DQ280242 | DQ280244 | DQ280240 |
| A/swine/Ontario/3/1981              | CY026450 | CY026449 | CY026448 | CY026443 | CY026446 | CY026445 | CY026444 | CY026447 |
| A/swine/Ontario/4/1981              | CY022388 | CY022387 | CY022386 | CY022381 | CY022384 | CY022383 | CY022382 | CY022385 |
| A/swine/Ontario/53518/2003          | DQ280213 | DQ280214 | DQ280215 | DQ280219 | DQ280217 | DQ280218 | DQ280220 | DQ280216 |
| A/swine/Ontario/57561/2003          | DQ280189 | DQ280190 | DQ280191 | DQ280195 | DQ280193 | DQ280194 | DQ280196 | DQ280192 |
| A/swine/QC/1531-3/2009              | JF713871 | JF713872 | JF713873 | JF713874 | JF713875 | JF713876 | JF713877 | JF713878 |
| A/swine/Saskatchewan/18789/2002     | AY619954 | AY619955 | AY619956 | AY619961 | AY619958 | AY619960 | AY619959 | AY619957 |
| A/swine/Wisconsin/641/1980          | CY022452 | CY022451 | CY022450 | CY022445 | CY022448 | CY022447 | CY022446 | CY022449 |
| A/SW/MB/5-5/2009                    | JF714017 | JF714018 | JF714019 | JF714020 | JF714021 | JF714022 | JF714023 | JF714024 |
| A/Baylor/11515/1982                 | CY010371 | CY010370 | CY010369 | CY010364 | CY010367 | CY010366 | CY010365 | CY010368 |
| A/Baylor/4052/1981                  | CY021036 | CY021035 | CY021034 | CY021029 | CY021032 | CY021031 | CY021030 | CY021033 |
| A/California/UR06-0479/2007         | CY028314 | CY028313 | CY028312 | CY028307 | CY028310 | CY028309 | CY028308 | CY028311 |
| A/Florida/06/2012                   | JX905428 | JX905427 | JX905429 | JX905426 | JX905430 | JX905423 | JX905425 | JX905424 |
| A/Florida/2/1993                    | CY125051 | CY125050 | CY125049 | CY125044 | CY125047 | CY125046 | CY125045 | CY125048 |
| A/California/VRDL256/2009           | CY074378 | CY074377 | CY074376 | CY074371 | CY074374 | CY074373 | CY074372 | CY074375 |
| A/California/VRDL280/2009           | CY074442 | CY074441 | CY074440 | CY074435 | CY074438 | CY074437 | CY074436 | CY074439 |
| A/California/VRDL295/2009           | CY074498 | CY074497 | CY074496 | CY074491 | CY074494 | CY074493 | CY074492 | CY074495 |
| A/California/VRDL299/2009           | CY074522 | CY074521 | CY074520 | CY074515 | CY074518 | CY074517 | CY074516 | CY074519 |
| A/Illinois/UR06-0491/2007           | CY026802 | CY026801 | CY026800 | CY026795 | CY026798 | CY026797 | CY026796 | CY026799 |
| A/Iowa/CEID23/2005                  | DQ889682 | DQ889683 | DQ889684 | DQ889689 | DQ889686 | DQ889687 | DQ889688 | DQ889685 |
| A/Kentucky/UR060-046/2007           | CY028042 | CY028041 | CY028040 | CY028035 | CY028038 | CY028037 | CY028036 | CY028039 |
| A/Kentucky/UR06-0539/2007           | CY025946 | CY025945 | CY025944 | CY025939 | CY025942 | CY025941 | CY025940 | CY025943 |
| A/Maryland/2/1980                   | CY020188 | CY020187 | CY020186 | CY020181 | CY020184 | CY020183 | CY020182 | CY020185 |
| A/Memphis/11/1983                   | CY011311 | CY011310 | CY011309 | CY011304 | CY011307 | CY011306 | CY011305 | CY011308 |
| A/Memphis/1/1983                    | CY012887 | CY012886 | CY012885 | CY012880 | CY012883 | CY012882 | CY012881 | CY012884 |
| A/Memphis/12/1986                   | CY019108 | CY019107 | CY019106 | CY019101 | CY019104 | CY019103 | CY019102 | CY019105 |
| A/Memphis/18/1983                   | CY010987 | CY010986 | CY010985 | CY010980 | CY010983 | CY010982 | CY010981 | CY010984 |
| A/Memphis/2/1983                    | CY012895 | CY012894 | CY012893 | CY012888 | CY012891 | CY012890 | CY012889 | CY012892 |
| A/Memphis/24/1983                   | CY017218 | CY017217 | CY017216 | CY017211 | CY017214 | CY017213 | CY017212 | CY017215 |
| A/Memphis/3/1996                    | CY019124 | CY019123 | CY019122 | CY019117 | CY019120 | CY019119 | CY019118 | CY019121 |
| A/Memphis/39/1983                   | CY020244 | CY020243 | CY020242 | CY020237 | CY020240 | CY020239 | CY020238 | CY020241 |
| A/Memphis/4/1987                    | CY019786 | CY019785 | CY019784 | CY019779 | CY019782 | CY019781 | CY019780 | CY019783 |
| A/Memphis/6/1983                    | CY015531 | CY015530 | CY015529 | CY015524 | CY015527 | CY015526 | CY015525 | CY015528 |
| A/Memphis/8/1983                    | CY010947 | CY010946 | CY010945 | CY010940 | CY010943 | CY010942 | CY010941 | CY010944 |
| A/New York/146/2000                 | CY000455 | CY000456 | CY000454 | CY000449 | CY000452 | CY000451 | CY000450 | CY000453 |
| A/New York/242/2001                 | CY006362 | CY006361 | CY006360 | CY006355 | CY006358 | CY006357 | CY006356 | CY006359 |
| A/New York/2924-1/1986              | CY021740 | CY021739 | CY021738 | CY021733 | CY021736 | CY021735 | CY021734 | CY021737 |
| A/New York/441/2001                 | CY009243 | CY009242 | CY009241 | CY009236 | CY009239 | CY009238 | CY009237 | CY009240 |
| A/New York/614/1995                 | CY010811 | CY010810 | CY010809 | CY010804 | CY010807 | CY010806 | CY010805 | CY010808 |
| A/New York/629/1995                 | CY011807 | CY011806 | CY011805 | CY011800 | CY011803 | CY011802 | CY011801 | CY011804 |
| A/New York/633/1995                 | CY016970 | CY016969 | CY016968 | CY016963 | CY016966 | CY016965 | CY016964 | CY016967 |
| A/New York/643/1995                 | CY013286 | CY013285 | CY013284 | CY013279 | CY013282 | CY013281 | CY013280 | CY013283 |

North American human

|                                |                                  |          |          |          |          |          |          |          |
|--------------------------------|----------------------------------|----------|----------|----------|----------|----------|----------|----------|
| A/New York/656/1995            | CY013310                         | CY013309 | CY013308 | CY013303 | CY013306 | CY013305 | CY013304 | CY013307 |
| A/New York/UR06-0199/2007      | CY026634                         | CY026633 | CY026632 | CY026627 | CY026630 | CY026629 | CY026628 | CY026631 |
| A/Oregon/UR06-0185/2007        | CY027962                         | CY027961 | CY027960 | CY027955 | CY027958 | CY027957 | CY027956 | CY027959 |
| A/Saskatchewan/5131/2009       | GQ457544                         | GQ457566 | GQ457562 | GQ457547 | GQ457556 | GQ457553 | GQ457550 | GQ457559 |
| A/South Dakota/WRAIR1113P/2009 | CY069370                         | CY069371 | CY069372 | CY069373 | CY069374 | CY069375 | CY069376 | CY069377 |
| A/Tennessee/UR06-0379/2007     | CY037782                         | CY037781 | CY037780 | CY037775 | CY037778 | CY037777 | CY037776 | CY037779 |
| A/Texas/JMM/53/2012            | CY135123                         | CY135122 | CY135121 | CY135116 | CY135119 | CY135118 | CY135117 | CY135120 |
| A/Texas/UR06-0503/2007         | CY027890                         | CY027889 | CY027888 | CY027883 | CY027886 | CY027885 | CY027884 | CY027887 |
| A/Texas/UR06-0582/2007         | CY026722                         | CY026721 | CY026720 | CY026715 | CY026718 | CY026717 | CY026716 | CY026719 |
| A/Texas/WRAIR1118P/2009        | CY100809                         | CY100810 | CY100811 | CY100812 | CY100813 | CY100814 | CY100815 | CY100816 |
| A/Vermont/UR06-0511/2007       | CY026626                         | CY026625 | CY026624 | CY026619 | CY026622 | CY026621 | CY026620 | CY026623 |
| A/Vermont/UR06-0573/2007       | CY026578                         | CY026577 | CY026576 | CY026571 | CY026574 | CY026573 | CY026572 | CY026575 |
| Eurasian avian                 | A/duck/Italy/281904/2006         | FJ432777 | FJ432776 | FJ432775 | FJ432770 | FJ432773 | FJ432772 | FJ432771 |
|                                | A/duck/Italy/69238/2007          | FJ432761 | FJ432760 | FJ432759 | FJ432754 | FJ432757 | FJ432756 | FJ432755 |
|                                | A/duck/Shimane/188/1999          | CY091589 | CY091590 | CY091591 | CY091592 | CY091593 | CY091594 | CY091595 |
|                                | A/goose/Italy/296426/2003        | FJ432785 | FJ432784 | FJ432783 | FJ432778 | FJ432781 | FJ432779 | FJ432782 |
|                                | A/mallard/Bavaria/185-8/2008     | HQ259221 | HQ259222 | HQ259223 | HQ259224 | HQ259225 | HQ259226 | HQ259227 |
|                                | A/mallard/Marquenterre/Z237/1983 | DQ864507 | DQ864506 | DQ864508 | GU066779 | DQ864509 | GU066780 | GU066781 |
| Eurasian swine                 | A/swine/Bieganow/1/2001          | CY115870 | CY115871 | CY115872 | CY115873 | CY115874 | CY115875 | CY115876 |
|                                | A/swine/Chachoengsao/NIH587/2005 | AB434325 | AB434326 | AB434327 | AB434328 | AB434329 | AB434330 | AB434331 |
|                                | A/swine/Chonburi/NIH9469/2004    | AB434301 | AB434302 | AB434303 | AB434304 | AB434305 | AB434306 | AB434307 |
|                                | A/swine/Cotes d'Armor/1624/2002  | CY116385 | CY116386 | CY116387 | CY116388 | CY116389 | CY116390 | CY116391 |
|                                | A/swine/England/004772/2001      | CY115917 | CY115918 | JX843272 | CY115919 | CY115920 | CY115921 | CY115922 |
|                                | A/swine/England/101692/1997      | CY115932 | CY115933 | CY115934 | CY115935 | CY115936 | CY115937 | CY115938 |
|                                | A/swine/England/1093/2005        | CY115948 | CY115949 | CY115950 | CY115951 | CY115952 | CY115953 | CY115954 |
|                                | A/swine/England/1131/2004        | CY115956 | CY115957 | CY115958 | CY115959 | CY115960 | CY115961 | CY115962 |
|                                | A/swine/England/117316/1986      | CY115972 | CY115973 | CY115974 | CY115975 | CY115976 | CY115977 | CY115978 |
|                                | A/swine/England/167655/1997      | CY116001 | CY116002 | CY116003 | CY116004 | CY116005 | CY116006 | CY116007 |
|                                | A/swine/England/17787/2000       | CY116009 | CY116010 | CY116011 | CY116012 | CY116013 | CY116014 | CY116015 |
|                                | A/swine/England/17788/2000       | CY116017 | CY116018 | CY116019 | CY116020 | CY116021 | CY116022 | CY116023 |
|                                | A/swine/England/193667/1998      | CY116025 | CY116026 | CY116027 | CY116028 | CY116029 | CY116030 | CY116031 |
|                                | A/swine/England/195852/1992      | CY116033 | CY116034 | CY116035 | CY116036 | CY116037 | CY116038 | CY116039 |
|                                | A/swine/England/252411/1992      | CY116055 | CY116056 | CY116057 | CY116058 | CY116059 | CY116060 | CY116061 |
|                                | A/swine/England/254/2002         | CY116063 | CY116064 | CY116065 | CY116066 | CY116067 | CY116068 | CY116069 |
|                                | A/swine/England/283902/1993      | CY116087 | CY116088 | CY116089 | CY116090 | CY116091 | CY116092 | CY116093 |
|                                | A/swine/England/33780/2006       | CY116108 | CY116109 | CY116110 | CY116111 | CY116112 | CY116113 | CY116114 |
|                                | A/swine/England/35320/1999       | CY116116 | CY116117 | CY116118 | CY116119 | CY116120 | CY116121 | CY116122 |
|                                | A/swine/England/383/2005         | CY116140 | CY116141 | CY116142 | CY116143 | CY116144 | CY116145 | CY116146 |
|                                | A/swine/England/39572/2001       | CY116148 | CY116149 | CY116150 | CY116151 | CY116152 | CY116153 | CY116154 |
|                                | A/swine/England/410711/1994      | CY116164 | CY116165 | CY116166 | CY116167 | CY116168 | CY116169 | CY116170 |
|                                | A/swine/England/453/2006         | CY116203 | CY116204 | CY116205 | CY116206 | CY116207 | CY116208 | CY116209 |
|                                | A/swine/England/57610/1999       | CY116219 | CY116220 | CY116221 | CY116222 | CY116223 | CY116224 | CY116225 |
|                                | A/swine/England/68327/1998       | CY116273 | CY116274 | CY116275 | CY116276 | CY116277 | CY116278 | CY116279 |
|                                | A/swine/England/745769/1995      | CY116288 | CY116289 | CY116290 | CY116291 | CY116292 | CY116293 | CY116294 |
|                                | A/swine/England/771270/1995      | CY116296 | CY116297 | CY116298 | CY116299 | CY116300 | CY116301 | CY116302 |
|                                | A/swine/England/79851/1990       | CY116304 | CY116305 | CY116306 | CY116307 | CY116308 | CY116309 | CY116310 |
|                                | A/swine/Finnistere/800/2004      | CY116353 | CY116354 | CY116355 | CY116356 | CY116357 | CY116358 | CY116359 |
|                                | A/swine/Fujian/204/2007          | FJ536816 | FJ536817 | FJ536815 | FJ536810 | FJ536813 | FJ536812 | FJ536814 |
|                                | A/swine/Gent/112/2007            | CY116423 | CY116424 | CY116425 | CY116426 | CY116427 | CY116428 | CY116429 |

|                               |          |          |          |          |          |          |          |          |
|-------------------------------|----------|----------|----------|----------|----------|----------|----------|----------|
| A/swine/Gent/132/2005         | CY116431 | CY116432 | CY116433 | CY116434 | CY116435 | CY116436 | CY116437 | CY116438 |
| A/swine/Guangdong/103/2002    | GQ422382 | GQ422383 | GQ422384 | GQ422385 | GQ422386 | GQ422387 | GQ422388 | GQ422389 |
| A/swine/Guangdong/1/2010      | HM189301 | HM189302 | HM189303 | HM189308 | HM189305 | HM189306 | HM189307 | HM189304 |
| A/swine/Guangdong/1408/2010   | JN375003 | JN375045 | JN375075 | JN375122 | JN375153 | JN375189 | JN375230 | JN375261 |
| A/swine/Guangdong/1613/2010   | JN375019 | JN375060 | JN375096 | JN375132 | JN375163 | JN375200 | JN375235 | JN375272 |
| A/swine/Guangdong/34/2006     | CY089864 | CY089865 | CY089866 | CY089867 | CY089868 | CY089869 | CY089870 | CY089871 |
| A/swine/Guangdong/L3/2009     | HQ877024 | HQ877025 | HQ877026 | HQ877027 | HQ877028 | HQ877029 | HQ877030 | HQ877031 |
| A/swine/Guangxi/12/2005       | HQ541663 | HQ541662 | HQ541661 | HQ541656 | HQ541659 | HQ541658 | HQ541657 | HQ541660 |
| A/swine/Heilongjiang/44/2009  | HQ541694 | HQ541695 | HQ541693 | HQ541688 | HQ541691 | HQ541690 | HQ541689 | HQ541692 |
| A/swine/Hokkaido/2/1981       | AB434389 | AB434390 | AB434391 | AB434392 | AB434393 | AB434394 | AB434395 | AB434396 |
| A/swine/Holguin/121/2010      | HE584745 | HE584746 | HE584747 | HE584748 | HE584749 | HE584750 | HE584751 | HE584752 |
| A/swine/Hong Kong/1290/1993   | CY085078 | CY085079 | CY085080 | CY085081 | CY085082 | CY085083 | CY085084 | CY085085 |
| A/swine/Hong Kong/1535/2009   | CY061706 | CY061707 | CY061708 | CY061709 | CY061710 | CY061711 | CY061712 | CY061713 |
| A/swine/Hong Kong/1559/2008   | CY085875 | CY085876 | CY085877 | CY085878 | CY085879 | CY085880 | CY085881 | CY085882 |
| A/swine/Hong Kong/227/2002    | CY085491 | CY085492 | CY085493 | CY085494 | CY085495 | CY085496 | CY085497 | CY085498 |
| A/swine/Hong Kong/2433/2009   | CY061818 | CY061819 | CY061820 | CY061821 | CY061822 | CY061823 | CY061824 | CY061825 |
| A/swine/Hong Kong/2445/1994   | CY087069 | CY087070 | CY087071 | CY087072 | CY087073 | CY087074 | CY087075 | CY087076 |
| A/swine/Hong Kong/245/2009    | CY085931 | CY085932 | CY085933 | CY085934 | CY085935 | CY085936 | CY085937 | CY085938 |
| A/swine/Hong Kong/2461/1994   | CY087077 | CY087078 | CY087079 | CY087080 | CY087081 | CY087082 | CY087083 | CY087084 |
| A/swine/Hong Kong/3001/2009   | CY061874 | CY061875 | CY061876 | CY061877 | CY061878 | CY061879 | CY061880 | CY061881 |
| A/swine/Hong Kong/347/1993    | CY084990 | CY084991 | CY084992 | CY084993 | CY084994 | CY084995 | CY084996 | CY084997 |
| A/swine/Hong Kong/414/2009    | CY085987 | CY085988 | CY085989 | CY085990 | CY085991 | CY085992 | CY085993 | CY085994 |
| A/swine/Hong Kong/435/2007    | CY085827 | CY085828 | CY085829 | CY085830 | CY085831 | CY085832 | CY085833 | CY085834 |
| A/swine/Hong Kong/5683/1999   | CY087133 | CY087134 | CY087135 | CY087136 | CY087137 | CY087138 | CY087139 | CY087140 |
| A/swine/Hong Kong/638/2003    | CY085555 | CY085556 | CY085557 | CY085558 | CY085559 | CY085560 | CY085561 | CY085562 |
| A/swine/Hong Kong/676/2008    | CY085851 | CY085852 | CY085853 | CY085854 | CY085855 | CY085856 | CY085857 | CY085858 |
| A/swine/Hong Kong/71/2009     | CY085891 | CY085892 | CY085893 | CY085894 | CY085895 | CY085896 | CY085897 | CY085898 |
| A/swine/Hong Kong/7191/2000   | CY085315 | CY085316 | CY085317 | CY085318 | CY085319 | CY085320 | CY085321 | CY085322 |
| A/swine/Hong Kong/72/2007     | CY085811 | CY085812 | CY085813 | CY085814 | CY085815 | CY085816 | CY085817 | CY085818 |
| A/swine/Hong Kong/752/2002    | CY085499 | CY085500 | CY085501 | CY085502 | CY085503 | CY085504 | CY085505 | CY085506 |
| A/swine/Hong Kong/7635/2000   | CY085339 | CY085340 | CY085341 | CY085342 | CY085343 | CY085344 | CY085345 | CY085346 |
| A/swine/Hong Kong/7945/2000   | CY085363 | CY085364 | CY085365 | CY085366 | CY085367 | CY085368 | CY085369 | CY085370 |
| A/swine/Hong Kong/8278/2001   | CY085371 | CY085372 | CY085373 | CY085374 | CY085375 | CY085376 | CY085377 | CY085378 |
| A/swine/Hong Kong/835/1993    | CY085062 | CY085063 | CY085064 | CY085065 | CY085066 | CY085067 | CY085068 | CY085069 |
| A/swine/Hong Kong/8631/2001   | CY085387 | CY085388 | CY085389 | CY085390 | CY085391 | CY085392 | CY085393 | CY085394 |
| A/swine/Hong Kong/8709/2001   | CY085403 | CY085404 | CY085405 | CY085406 | CY085407 | CY085408 | CY085409 | CY085410 |
| A/swine/Hong Kong/NS1022/2001 | CY085427 | CY085428 | CY085429 | CY085430 | CY085431 | CY085432 | CY085433 | CY085434 |
| A/swine/Hong Kong/NS1071/2009 | CY061682 | CY061683 | CY061684 | CY061685 | CY061686 | CY061687 | CY061688 | CY061689 |
| A/swine/Hong Kong/NS120/2007  | CY085819 | CY085820 | CY085821 | CY085822 | CY085823 | CY085824 | CY085825 | CY085826 |
| A/swine/Hong Kong/NS129/2003  | CY085547 | CY085548 | CY085549 | CY085550 | CY085551 | CY085552 | CY085553 | CY085554 |
| A/swine/Hong Kong/NS1344/2001 | CY085451 | CY085452 | CY085453 | CY085454 | CY085455 | CY085456 | CY085457 | CY085458 |
| A/swine/Hong Kong/NS143/2000  | CY085347 | CY085348 | CY085349 | CY085350 | CY085351 | CY085352 | CY085353 | CY085354 |
| A/swine/Hong Kong/NS1680/2001 | CY085475 | CY085476 | CY085477 | CY085478 | CY085479 | CY085480 | CY085481 | CY085482 |
| A/swine/Hong Kong/NS184/2009  | CY085971 | CY085972 | CY085973 | CY085974 | CY085975 | CY085976 | CY085977 | CY085978 |
| A/swine/Hong Kong/NS43/2009   | CY085907 | CY085908 | CY085909 | CY085910 | CY085911 | CY085912 | CY085913 | CY085914 |
| A/swine/Hong Kong/NS613/2009  | CY061626 | CY061627 | CY061628 | CY061629 | CY061630 | CY061631 | CY061632 | CY061633 |
| A/swine/Hong Kong/NS952/2008  | CY085867 | CY085868 | CY085869 | CY085870 | CY085871 | CY085872 | CY085873 | CY085874 |
| A/swine/Hubei/02/2008         | JX138514 | JX138515 | JX138516 | JX138517 | JX138518 | JX138519 | JX138520 | JX138521 |
| A/swine/Hubei/104/2009        | CY091766 | CY091767 | CY091768 | CY091769 | CY091770 | CY091771 | CY091772 | CY091773 |

|                                     |          |          |          |          |          |          |          |          |
|-------------------------------------|----------|----------|----------|----------|----------|----------|----------|----------|
| A/swine/Hunan/26/2010               | HQ541655 | HQ541654 | HQ541653 | HQ541649 | HQ541652 | HQ541651 | HQ541650 | HQ541648 |
| A/swine/Ille et Vilaine/1455/1999   | CY116377 | CY116378 | CY116379 | CY116380 | CY116381 | CY116382 | CY116383 | CY116384 |
| A/swine/Italy/1369-7/1994           | CY098497 | CY098498 | CY098499 | CY098500 | CY098501 | CY098502 | CY098503 | CY098504 |
| A/swine/Italy/1513-1/1998           | CY116455 | CY116456 | CY116457 | CY116458 | CY116459 | CY116460 | CY116461 | CY116462 |
| A/swine/Italy/151672-3/2003         | CY116463 | CY116464 | CY116465 | CY116466 | CY116467 | CY116468 | CY116469 | CY116470 |
| A/swine/Italy/172336/2001           | CY116484 | CY116485 | CY116486 | CY116487 | CY116488 | CY116489 | CY116490 | CY116491 |
| A/swine/Italy/186678-2/2005         | CY116492 | CY116493 | CY116494 | CY116495 | CY116496 | CY116497 | CY116498 | CY116499 |
| A/swine/Italy/29313/2006            | CY116516 | CY116517 | CY116518 | CY116519 | CY116520 | CY116521 | CY116522 | CY116523 |
| A/swine/Italy/670/1987              | CY025260 | CY025259 | CY025258 | CY025253 | CY025256 | CY025255 | CY025254 | CY025257 |
| A/swine/Jiangsu/s16/2011            | JF820282 | JF820283 | JF820284 | JF820285 | JF820286 | JF820287 | JF820288 | JF820289 |
| A/swine/Jiangsu/zg13/2011           | JN809104 | JN809122 | JN809139 | JN809159 | JN809176 | JN809193 | JN809211 | JN809230 |
| A/swine/Jiangsu/zg14/2011           | JN809105 | JN809123 | JN809140 | JN809160 | JN809177 | JN809194 | JN809212 | JN809231 |
| A/swine/Jiangsu/zg15/2011           | JN809106 | JN809124 | JN809141 | JN809161 | JN809178 | JN809199 | JN809213 | JN809232 |
| A/swine/Jiangsu/zg2/2010            | JN809094 | JN809112 | JN809130 | JN809148 | JN809166 | JN809184 | JN809201 | JN809220 |
| A/swine/Jiangsu/zg4/2010            | JN809097 | JN809115 | JN809132 | JN809150 | JN809169 | JN809187 | JN809204 | JN809223 |
| A/swine/Jiangsu/zg5/2010            | JN809096 | JN809114 | JN809131 | JN809151 | JN809168 | JN809186 | JN809203 | JN809222 |
| A/swine/Jiangsu/zg6/2010            | JN809098 | JN809116 | JN809133 | JN809152 | JN809170 | JN809188 | JN809205 | JN809224 |
| A/swine/Jiangsu/zg8/2010            | JN809100 | JN809118 | JN809135 | JN809154 | JN809172 | JN809190 | JN809207 | JN809226 |
| A/swine/Lutol/3/2000                | CY116528 | CY116529 | CY116530 | CY116531 | CY116532 | CY116533 | CY116534 | CY116535 |
| A/swine/Okinawa/1/2005              | AB600242 | AB600560 | AB600844 | AB600849 | AB600854 | AB600859 | AB600864 | AB600943 |
| A/swine/OMS/2111/1995               | CY116393 | CY116394 | CY116395 | CY116396 | CY116397 | CY116398 | CY116399 | CY116400 |
| A/swine/OMS/2112/1995               | CY116401 | CY116402 | CY116403 | CY116404 | CY116405 | CY116406 | CY116407 | CY116408 |
| A/swine/Ratchaburi/NIAH101942/2008  | AB514933 | AB514934 | AB514935 | AB514936 | AB514939 | AB514941 | AB514942 | AB514943 |
| A/swine/Ratchaburi/NIAH1481/2000    | AB434285 | AB434286 | AB434287 | AB434288 | AB434289 | AB434290 | AB434291 | AB434292 |
| A/swine/Ratchaburi/NIAH550/2003     | AB434293 | AB434294 | AB434295 | AB434296 | AB434297 | AB434298 | AB434299 | AB434300 |
| A/swine/Saraburi/NIAH100761-22/2009 | AB620160 | AB620161 | AB620162 | AB620163 | AB620164 | AB620165 | AB620166 | AB620167 |
| A/swine/Shandong/275/2009           | GU086062 | GU086063 | GU086064 | GU086065 | GU086066 | GU086067 | GU086068 | GU086069 |
| A/swine/Spain/50047/2003            | CY009899 | CY009898 | CY009897 | CY009892 | CY009895 | CY009894 | CY009893 | CY009896 |
| A/swine/Spain/51915/2003            | CY010579 | CY010578 | CY010577 | CY010572 | CY010575 | CY010574 | CY010573 | CY010576 |
| A/swine/Spain/53207/2004            | CY010587 | CY010586 | CY010585 | CY010580 | CY010583 | CY010582 | CY010581 | CY010584 |
| A/swine/Tianjin/01/2004             | EU004447 | EU004446 | EU004445 | EU004444 | EU004443 | EU004442 | EU004440 | EU004441 |
| A/Beijing/262/1995                  | CY033621 | CY033620 | CY033619 | CY033614 | CY033617 | CY033616 | CY033615 | CY033618 |
| A/DaNang/DN238/2008                 | CY104885 | CY104884 | CY104883 | CY104878 | CY104881 | CY104880 | CY104879 | CY104882 |
| A/England/493/2006                  | FJ445082 | FJ445043 | FJ445056 | FJ445027 | FJ445088 | FJ445052 | FJ445077 | FJ445039 |
| A/England/593/2006                  | FJ445071 | FJ445034 | FJ445035 | FJ445073 | FJ445042 | FJ445058 | FJ445051 | FJ445049 |
| A/England/594/2006                  | FJ445067 | FJ445055 | FJ445078 | FJ445047 | FJ445074 | FJ445066 | FJ445048 | FJ445086 |
| A/Fujian/156/2000                   | CY125131 | CY125130 | CY125129 | CY125124 | CY125127 | CY125126 | CY125125 | CY125128 |
| A/HaNoi/HN981/2003                  | CY104821 | CY104820 | CY104819 | CY104814 | CY104817 | CY104816 | CY104815 | CY104818 |
| A/HaNoi/Q580/2006                   | CY104291 | CY104290 | CY104289 | CY104284 | CY104287 | CY104286 | CY104285 | CY104288 |
| A/HoChiMinh/HCM554/2006             | CY104669 | CY104668 | CY104667 | CY104662 | CY104665 | CY104664 | CY104663 | CY104666 |
| A/Malaysia/12530/1997               | CY117751 | CY117750 | CY117749 | CY117744 | CY117747 | CY117746 | CY117745 | CY117748 |
| A/Malaysia/14075/1997               | CY119105 | CY119104 | CY119103 | CY119098 | CY119101 | CY119100 | CY119099 | CY119102 |
| A/Malaysia/14210/1997               | CY119113 | CY119112 | CY119111 | CY119106 | CY119109 | CY119108 | CY119107 | CY119110 |
| A/Malaysia/14817/1997               | CY119121 | CY119120 | CY119119 | CY119114 | CY119117 | CY119116 | CY119115 | CY119118 |
| A/Malaysia/1715991/2007             | CY119241 | CY119240 | CY119239 | CY119234 | CY119237 | CY119236 | CY119235 | CY119238 |
| A/Malaysia/1828663/2007             | CY118106 | CY118105 | CY118104 | CY118099 | CY118102 | CY118101 | CY118100 | CY118103 |
| A/Malaysia/33132/2005               | CY119185 | CY119184 | CY119183 | CY119178 | CY119181 | CY119180 | CY119179 | CY119182 |
| A/Malaysia/33166/2005               | CY119193 | CY119192 | CY119191 | CY119186 | CY119189 | CY119188 | CY119187 | CY119190 |
| A/Nanchang/19/1996                  | CY013852 | CY013851 | CY013850 | CY013845 | CY013848 | CY013847 | CY013846 | CY013849 |

Eurasian human

|                               |          |          |          |          |          |          |          |          |
|-------------------------------|----------|----------|----------|----------|----------|----------|----------|----------|
| A/Niigata/07F102/2008         | CY043382 | CY043383 | CY043384 | CY043385 | CY043386 | CY043387 | CY043388 | CY043389 |
| A/Philippines/WRAIR1736P/2006 | CY100977 | CY100978 | CY100979 | CY100980 | CY100981 | CY100982 | CY100983 | CY100984 |
| A/Russia/2187/2002            | CY125171 | CY125170 | CY125169 | CY125164 | CY125167 | CY125166 | CY125165 | CY125168 |
| A/Siena/10/1989               | CY036830 | CY036829 | CY036828 | CY036823 | CY036826 | CY036825 | CY036824 | CY036827 |
| A/Siena/4/1987                | CY045859 | CY045858 | CY045857 | CY045852 | CY045855 | CY045854 | CY045853 | CY045856 |
| A/Siena/9/1989                | CY036950 | CY036949 | CY036948 | CY036943 | CY036946 | CY036945 | CY036944 | CY036947 |
| A/St. Petersburg/8/2006       | CY035133 | CY035132 | CY035131 | CY035126 | CY035129 | CY035128 | CY035127 | CY035130 |
| A/Switzerland/5165/2010       | CY079549 | CY079542 | CY079543 | CY079544 | CY079545 | CY079546 | CY079547 | CY079548 |
| A/Taiwan/4845/1999            | DQ415285 | DQ415296 | DQ415307 | DQ415318 | DQ415329 | DQ415340 | DQ415351 | DQ415362 |
| A/Taiwan/567/2002             | CY040081 | CY040080 | CY040079 | CY040074 | CY040077 | CY040076 | CY040075 | CY040078 |
| A/TayNguyen/TN334/2005        | CY105357 | CY105356 | CY105355 | CY105350 | CY105353 | CY105352 | CY105351 | CY105354 |
| A/Thailand/CU44/2006          | FJ912913 | FJ912914 | FJ912915 | EU021258 | FJ912916 | EU021259 | FJ912917 | FJ912918 |
| A/TW/3355/1997                | DQ415284 | DQ415295 | DQ415306 | DQ415317 | DQ415328 | DQ415339 | DQ415350 | DQ415361 |
| <b>2009 pandemic</b>          |          |          |          |          |          |          |          |          |
| A/Boston/140/2009             | CY064675 | CY064674 | CY064673 | CY064668 | CY064671 | CY064670 | CY064669 | CY064672 |
| A/California/VRDL61/2009      | CY055002 | CY055001 | CY055000 | CY054995 | CY054998 | CY054997 | CY054996 | CY054999 |
| A/Guangdong/5301/2009         | CY103903 | CY103904 | CY103905 | CY103906 | CY103907 | CY103908 | CY103909 | CY103910 |
| A/Managua/3642.04/2009        | CY072645 | CY072644 | CY072643 | CY072638 | CY072641 | CY072640 | CY072639 | CY072642 |
| A/Mexico City/IBT23/2009      | CY100453 | CY100454 | CY100455 | CY100456 | CY100457 | CY100458 | CY100459 | CY100460 |
| A/NewYork/5988/2009           | CY056626 | CY056625 | CY056624 | CY056619 | CY056622 | CY056621 | CY056620 | CY056623 |
| A/Quebec/144180/2009          | FN434467 | FN434466 | FN434465 | FN434469 | FN434468 | FN434470 | FN434471 | FN434472 |
| A/San Diego/INS62/2009        | CY083676 | CY083675 | CY083674 | CY083669 | CY083672 | CY083671 | CY083670 | CY083673 |
| A/Texas/JMS356/2009           | CY060850 | CY060849 | CY060848 | CY060843 | CY060846 | CY060845 | CY060844 | CY060847 |
| A/Wisconsin/629-D00859/2009   | CY063306 | CY063305 | CY063304 | CY063299 | CY063302 | CY063301 | CY063300 | CY063303 |

<sup>a</sup> The geography and host column was colored based on the taxa color in the phylogenetic trees shown in S1-S8 Figures.

<sup>b</sup> Pathogenicity index for North American avian viruses from St. Jude influenza repository was calculated as a function of survival and weight loss (Kocer et al., 2012)
