# Supplementary material for: The Genomic Contributions of Avian H1N1 Influenza A Viruses to the Evolution of Mammalian Strains
Source: PubMed Central journal article supplement (PMC4514870; doi:10.1371/journal.pone.0133795), 2015-07-24
Supplement: pone.0133795.s008.pdf [file pone.0133795.s008.pdf]

**S2 Table.** Amino acid substitutions at the HA antigenic sites in avian, human\*, and pandemic H1N1 IAVs

| Year isolated | Antigenic Site | Amino Acid Position and Substitutions |     |     |     |     |     |     |     |     |     |     |     |     |
|---------------|----------------|---------------------------------------|-----|-----|-----|-----|-----|-----|-----|-----|-----|-----|-----|-----|
|               |                | 141                                   | 142 | 170 | 171 | 172 | 173 | 174 | 176 | 177 | 178 | 179 | 180 | 181 |
|               | Sa             | 141                                   | 142 | 170 | 171 | 172 | 173 | 174 | 176 | 177 | 178 | 179 | 180 | 181 |
| 1918          |                | P                                     | N   | K   | K   | G   | S   | S   | P   | K   | L   | S   | K   | S   |
| 1934          |                | P                                     | N   | E   | K   | E   | G   | S   | P   | K   | L   | K   | N   | S   |
| 1942          |                | P                                     | K   | E   | K   | D   | G   | S   | P   | N   | L   | N   | N   | S   |
| 1950          |                | P                                     | K   | E   | K   | N   | G   | S   | P   | N   | L   | K   | K   | S   |
| 1977          |                | P                                     | K   | E   | K   | N   | G   | S   | P   | N   | L   | S   | K   | S   |
| 1986          |                | P                                     | N   | K   | K   | N   | G   | S   | P   | N   | L   | S   | K   | S   |
| 1991          |                | P                                     | N   | K   | K   | N   | G   | L   | P   | N   | V   | S   | K   | S   |
| 1998          |                | P                                     | N   | E   | K   | N   | G   | L   | P   | N   | L   | S   | K   | S   |
| 2007          |                | P                                     | N   | G   | K   | N   | G   | L   | P   | N   | L   | S   | K   | S   |
| 2009          |                | P                                     | N   | K   | K   | G   | N   | S   | P   | K   | L   | S   | K   | S   |
| Char          |                | P                                     | N   | K   | K   | G   | N   | S   | P   | K   | I   | S   | K   | S   |
| Anser         |                | P                                     | N   | K   | K   | G   | T/N | S   | P   | K   | L   | S   | K   | S   |

|        | Ca | 154 | 155 | 156 | 157 | 158 <sup>†</sup> | 159 | 183 | 184 | 185 | 186 | 187 | 220 | 221 | 222 | 238 | 239 | 252 | 253 | 254 |
|--------|----|-----|-----|-----|-----|------------------|-----|-----|-----|-----|-----|-----|-----|-----|-----|-----|-----|-----|-----|-----|
| 1918   |    | S   | Y   | A   | G   | A                | S   | V   | N   | N   | K   | G   | S   | S   | K   | R   | D   | E   | P   | G   |
| 1934   |    | S   | H   | E   | G   | K                | S   | V   | N   | K   | K   | G   | T   | S   | N   | R   | D   | K   | P   | G   |
| 1942   |    | S   | H   | A   | G   | K                | C   | V   | N   | K   | K   | G   | S   | S   | N   | R   | G   | E   | P   | G   |
| 1950   |    | S   | H   | K   | G   | K                | S   | V   | N   | N   | K   | E   | S   | S   | N   | R   | G   | E   | P   | G   |
| 1977   |    | S   | H   | K   | G   | K                | S   | V   | N   | N   | K   | E   | S   | S   | N   | R   | G   | E   | P   | G   |
| 1986   |    | S   | H   | K   | G   | R                | S   | V   | N   | N   | K   | E   | S   | S   | H   | R   | D   | E   | P   | G   |
| 1991   |    | S   | H   | N   | G   | K                | S   | V   | N   | N   | K   | E   | S   | S   | H   | R   | D   | E   | P   | G   |
| 1998   |    | S   | H   | N   | G   | K                | S   | V   | N   | N   | K   | E   | S   | S   | H   | R   | D   | E   | P   | G   |
| 2007   |    | S   | H   | N   | G   | E                | S   | A   | N   | N   | K   | E   | S   | S   | H   | R   | D   | E   | P   | G   |
| 2009   |    | P   | H   | A   | G   | A                | K   | I   | N   | D   | K   | G   | S   | S   | R   | R   | D   | E   | P   | G   |
| Char   |    | P   | Y   | S   | G   | V                | S   | T   | N   | N   | K   | G   | S   | S   | K   | R   | G   | D   | Q   | G   |
| Answer |    | S   | Y   | S   | G   | A                | S   | T   | N   | N   | K   | G   | S   | S   | K   | R   | G   | D   | Q   | G   |

|        | Sb | 201 | 202 | 203 | 204 | 205 | 206 | 207 | 208 | 209 | 210 | 211 | 212 <sup>†</sup> |
|--------|----|-----|-----|-----|-----|-----|-----|-----|-----|-----|-----|-----|------------------|
| 1918   |    | T   | G   | T   | D   | Q   | Q   | S   | L   | Y   | Q   | N   | A                |
| 1934   |    | N   | S   | K   | E   | Q   | Q   | N   | I   | Y   | Q   | N   | E                |
| 1942   |    | N   | I   | K   | D   | Q   | Q   | T   | L   | Y   | Q   | K   | E                |
| 1950   |    | N   | I   | E   | D   | Q   | K   | T   | L   | Y   | R   | K   | E                |
| 1977   |    | N   | I   | E   | D   | Q   | K   | T   | I   | Y   | R   | K   | E                |
| 1986   |    | N   | I   | G   | D   | Q   | R   | A   | I   | Y   | H   | T   | E                |
| 1991   |    | N   | I   | G   | D   | Q   | R   | A   | I   | Y   | H   | T   | E                |
| 1998   |    | N   | I   | G   | D   | Q   | R   | A   | I   | Y   | H   | T   | E                |
| 2007   |    | N   | I   | G   | D   | Q   | K   | A   | L   | Y   | H   | T   | E                |
| 2009   |    | T   | S   | A   | D   | Q   | Q   | S   | L   | Y   | Q   | N   | A                |
| Char   |    | T   | T   | S   | E   | Q   | Q   | S   | L   | Y   | Q   | N   | I                |
| Answer |    | T   | T   | S/N | E   | Q   | Q   | S   | L   | Y   | Q   | N   | T/A              |

|       | Cb | 87 | 88 | 89 | 90 | 91 | 92 |
|-------|----|----|----|----|----|----|----|
| 1918  |    | L  | L  | T  | A  | S  | S  |
| 1934  |    | L  | L  | P  | V  | R  | S  |
| 1942  |    | L  | L  | S  | E  | R  | S  |
| 1950  |    | L  | F  | S  | K  | K  | S  |
| 1977  |    | L  | F  | S  | K  | K  | S  |
| 1986  |    | L  | F  | S  | K  | K  | S  |
| 1991  |    | L  | F  | S  | K  | E  | S  |
| 1998  |    | L  | I  | S  | K  | E  | S  |
| 2007  |    | L  | I  | S  | K  | E  | S  |
| 2009  |    | L  | S  | T  | A  | S  | S  |
| Char  |    | L  | L  | T  | A  | N  | S  |
| Anser |    | L  | L  | T  | A  | N  | S  |

- fully conserved
- largely conserved<sup>#</sup>
- 1918 & 2009 avian-like
- 1918-like only
- 2009-like only
- avian-like

\*The antigenic sites seen in human viruses between 1918 and 2009 were acquired from Igarashi et al [24].

†Positions 158 in Ca and 212 in Sb are “pandemic-like only” in the H1N1 IAVs of Anseriformes origin but not in those of Charadriiformes origin (shown in light blue).

<sup>#</sup>Residues were considered largely conserved when the same amino acid residue observed in many isolates over the years.
